# Supplementary material for: CIPK11: a calcineurin B-like protein-interacting protein kinase from Nitraria tangutorum, confers tolerance to salt and drought in Arabidopsis
Source: BMC Plant Biol. 2021 Mar 1;21:123. doi: 10.1186/s12870-021-02878-x (PMC7919098; doi:10.1186/s12870-021-02878-x)
Supplement: Supplementary file 1 — Additional file 1. Primers and accession information of the genes used in our study: Supplementary Table 1. Primers for isolation of the NtCIPK11 fragment; Supplementary Table 2. Primers for RACE; Supplementary Table 3. Primers for complete coding region of NtCIPK11 gene; Supplementary Table 4. CIPKs from other species for the conserved domain analysis; Supplementary Table 5. CIPK family genes in Arabidopsis for the phylogenic analysis; Supplementary Table 6. Primers for the qPCR analyses. [file 12870_2021_2878_MOESM1_ESM.xlsx]

## Sheet: Supplementary table 1
Supplementary table 1. Primers for isolation of NtCIPK11 fragment
Primer name	sequence
CIPK11 forward primer	5' CGCTAAGGTATACCATGCGCGTG 3'
CIPK11 reverse primer	5' CTTCCACACCTCAGTGTAACATGCG 3'
Primers designed with Primer3 for of NtCIPK11 fragment clone

## Sheet: Supplementary table 2
Supplementary table 2. Primers for RACE
Primer name	sequence
CIPK11:3’race primer A	5' CATGGTTCAGAAGGGGCGGGGTCAAGG 3'
CIPK11:3’race primer B	5' ACGAAGAAAGAATGGGGGGTGGAGTTGG 3'
CIPK11:3’race primer C	5' AACGGAGGAACTAGTGGTCGTGGAGG 3'
CIPK11:5’race primer A	5' ACGCCGCATGACCAGATATCCACC 3'
CIPK11:5’race primer B	5' CTGAACCTTCCTTTCGCCACCCT 3'
CIPK11:5’race primer C	5' TGGAGCTTCACGATATGGCGATGGTT 3'
Primers designed with Primer3 for the 3' end and 5' end of CIPK11. A, B and C primes indicate the different region of gene.

## Sheet: Supplementary table 3
Supplementary table 3. Primers for complete coding region of NtCIPK11 gene
Primer name	sequence
CIPK11:wl forward primer	5' GCTCTAGAATGCCGGAGATTGAACATGT 3'
CIPK11:wl reverse primer	5' TCCCCCGGGATGATTACCAGAAACCGAAGCT 3'

## Sheet: Supplementary table 4
Supplementary table 4. CIPKs from other species for conserved domain analysis
Gene name	Gene accession number	Species name
HbCIPK11	XP_021639925.1	Hevea brasiliensis
MeCIPK11	XP_021602639.1	Manihot esculenta
RcCIPK11	XP_002517709.1	Ricinus communis
JcCIPK11	XP_012078312.1	Jatropha curcas
HuCIPK11	XP_021279137.1	Herrania umbratica
CcCIPK11	XP_006431996.1	Citrus clementina
DzCIPK11	XP_022732152.1	Durio zibethinus
PtCIPK11	XP_024439447.1	Populus trichocarpa
AtCIPK11	AAK16686.1	Arabidopsis thaliana

## Sheet: Supplementary table 5
Supplementary table 5. CIPK family genes in Arabidopsis for phylogenic analysis
Gene name	Accession number
AtCIPK1	AAG28776.1
AtCIPK2	AAF86506.1
AtCIPK3	AEC07917.1
AtCIPK4	AAG01367.1
AtCIPK5	AAF86504.2
AtCIPK6	AEE85835.1
AtCIPK7	AEE76704.1
AtCIPK8	AEE84900.1
AtCIPK9	AEE27245.1
AtCIPK10	AED97046.1
AtCIPK11	AAK16686.1
AtCIPK12	AEE84078.1
AtCIPK13	AEC08929.1
AtCIPK14	AED90397.1
AtCIPK15	AED90395.1
AtCIPK16	AAK50348.1
AtCIPK17	AAK64513.1
AtCIPK18	AAK59695.1
AtCIPK19	AAK50347.1
AtCIPK20	AED95303.1
AtCIPK21	AAK59696.1
AtCIPK22	AEC09543.1
AtCIPK23	AAK61494.1
AtCIPK24	AED93966.1
AtCIPK25	AED93402.1
AtCIPK26	AED92948.1

## Sheet: Supplementary table 6
Supplementary table 6. Primers for qPCR analyses
Gene name	Accession number	Primer name	Sequence(5’-3’)
NtCIPK11	MW014363	NtCIPK11 F	ATACAAGGATTACCGTCGATCAGA
		NtCIPK11 R	TTCAAATTCCTCGCACCGAAC
NsActin2	AB617805	NsActin F	CATCCCTCATCGGAATGGAAGC
		NsActin R	GGTAGACCCACCACTAAGCACAATG
AtP5CS1	AT2G39800	AtP5CS1 F	GGGTCGAAGGATTACTTACAACGAG
		AtP5CS1 R	TTGGATGGGAATGTCCTGATGGGT
AtP5CS2	AT3G55610	AtP5CS2 F	CGTAGGATTTAGTGTTCCTTGAGGT
		AtP5CS2 R	GACATGAAGAGAAGCTGCTAAACATTTCAC
AtP5CR	AT5G14800	AtP5CR F	ATTCCGGCGGAGAGTTTCAAGGTA
		AtP5CR R	ACGGCGGTGCATATACGATTAGGA
AtProDH1	AT3G30775	AtProDH1 F	TCTCCGACGCGCTTATGAGAAC
		AtProDH1 R	ATACTCTCTCTTTACGCAATCCCGGC
AtUBQ10	AT4G05320.2	AtUBQ10 F	CCGGAAAGACCATCACCCTTG
		AtUBQ10 R	TGTAGTCGGCCAAAGTACGTC
